# Supplementary material
Source: PubMed Central journal article supplement (PMC3645567)
Supplement: 1217712110_pnas.201217712SI.pdf [file 1217712110_pnas.201217712SI.pdf]

# Supporting Information

Ikadai et al. 10.1073/pnas.1217712110

## SI Materials and Methods

**Quantitative RT-PCR of 16 Putatively Disrupted Transcripts in the Parental Line.** Schizonts from the parental line were collected on a 40%/70% Percoll-sorbitol gradient and returned to culture at a 4% hematocrit; 3 h later, the parasites were sorbitol synchronized to ensure a highly synchronous population of parasites. RNA was collected at 0, 12, 24, 30, 34, 38, 44, and 48 h postinvasion. Giemsa smears were made to confirm parasite asexual stages. RNA was extracted (TRIzol; Invitrogen), DNase was treated (Promega), and cDNA was synthesized (SuperScript III; Invitrogen). cDNA concentration was de-

termined on a Nanodrop (Thermo Scientific), and equal amounts of cDNA were used in each quantitative RT-PCR. Primers specific for the putatively disrupted transcripts were used to amplify ~150–200 bp of the coding region (Table S3). PF07\_0073 (seryl-tRNA synthetase), which remains stable throughout the lifecycle of the parasite (1), was used as an internal control. Quantitative RT-PCR was performed using SYBR Green qPCR Mastermix (ABI). Results were collected on an ABI 7300 and analyzed using ABI 7300 software using the relative quantification by  $\Delta\Delta C_t$  method compared with the PF07\_0073 gene reference (2).

1. Rovira-Graells N, et al. (2012) Transcriptional variation in the malaria parasite *Plasmodium falciparum*. *Genome Res* 22(5):925–938.

2. Livak KJ, Schmittgen TD (2001) Analysis of relative gene expression data using real-time quantitative PCR and the 2(-Delta Delta C(T)) method. *Methods* 25(4):402–408.

**Table S1. Southern blot and episomal PCR reveal that 22 of 29 IGMs contain single *piggyBac* insertions**

| Lane number | IGM  | Transfection number | Generation number | Number of insertions | Episome? (PCR) |
|-------------|------|---------------------|-------------------|----------------------|----------------|
| 1           | 1A2  | 1                   | 4                 | 1                    | Yes            |
| 2           | 1B5  | 1                   | 4                 | 1                    | No             |
| 3           | 1A4  | 1                   | 4                 | 2                    | No             |
| 4           | 1E5  | 1                   | 4                 | 2                    | No             |
| 5           | 1G1  | 1                   | 4                 | 1                    | Yes            |
| 6           | 1C5  | 1                   | 4                 | 1                    | Yes            |
| 7           | 2G2  | 3                   | 1                 | 1                    | No             |
| 8           | 2F5  | 3                   | 2                 | 2                    | No             |
| 9           | 2F4  | 3                   | 1                 | 1                    | No             |
| 10          | 2D3  | 3                   | 1                 | 1                    | No             |
| 11          | 2B4  | 3                   | 1                 | 1                    | No             |
| 12          | 2A2  | 3                   | 1                 | 1                    | Yes            |
| 13          | 2E2  | 3                   | 1                 | 1                    | No             |
| 14          | 2D4  | 3                   | 1                 | 2                    | Yes            |
| 15          | 2G3  | 3                   | 1                 | 2                    | No             |
| 16          | 2E4  | 3                   | 4                 | 1                    | No             |
| 17          | 2H2  | 3                   | 1                 | 1                    | No             |
| 18          | 2H3  | 3                   | 1                 | 1                    | No             |
| 19          | 2H12 | 2                   | 4                 | 2                    | Yes            |
| 20          | 2G6  | 3                   | 2                 | 2                    | No             |
| 21          | 2D7  | 3                   | 2                 | 1                    | No             |
| 22          | 2G10 | 2                   | 3                 | 1                    | No             |
| 23          | 2H8  | 3                   | 3                 | 1                    | No             |
| 24          | 2A9  | 2                   | 1                 | 1                    | No             |
| 25          | 2G11 | 2                   | 3                 | 1                    | No             |
| 26          | 2F11 | 2                   | 3                 | 1                    | Yes            |
| 27          | 2A11 | 2                   | 3                 | 1                    | No             |
| 28          | 2F12 | 2                   | 4                 | 1                    | No             |
| 29          | 2F6  | 3                   | 2                 | 1                    | No             |

Summary of Southern blot results. Lane number and IGM indicate which IGM corresponds to each lane on the Southern blot of Fig. 1C. IGMs were recovered from three independent transfection experiments (transfection number). Generation number indicates how long the parasite was cultured posttransfection before cloning and drug pressure. A single band on the Southern blot of Fig. 1C is considered a single insertion. When digested with *EcoRI*, an episomal *piggyBac* plasmid will produce a 6.2-kb band. To verify whether this band corresponds to an episome, PCR was performed using plasmid-specific primers (Fig. 1B and Table S3). IGMs that yielded two or more bands by Southern blotting and were not positive for an episome by PCR were classified as having more than one insertion.

**Table S2. Inverse PCR reveals *piggyBac* insertions in 9 of 14 *Plasmodium falciparum* chromosomes**

| Lane number | IGM  | Number of insertions | Chromosome | Insertion position | ITR1 side sequence                  | ITR2 side sequence                 |
|-------------|------|----------------------|------------|--------------------|-------------------------------------|------------------------------------|
| 1           | 1A2  | 1                    | 5          | 1288428            | ATCATATTACATTAA                     | TTAATTATAATGAAT                    |
| 2           | 1B5  | 1                    | 7          | 705469             | TGGTAATCTTTTAA                      | TTAAAATGGTATATA                    |
| 3           | 1A4  | 2                    | 7, 8       | 705469, 1308230    | TGGTAATCTTTTAA,<br>AACAAATGTTTATTAA | TTAAAATGGTATATA,<br>TTAAAAAATCTACG |
| 4           | 1E5  | 2                    | 5, ?       | 1142963            | TTATAATATATTAA                      | TTAAGATTGCATGAT                    |
| 5           | 1G1  | 1                    | 5          | 1288428            | ATCATATTACATTAA                     | TTAATTATAATGAAT                    |
| 6           | 1C5  | 1                    | 14         | 2544860            | ATAAATATCTTTTAA                     | TTAAAATACTCTTGG                    |
| 7           | 2G2  | 1                    | 9          | 1006267            | AAAAATATATATTAA                     | TTAATATATATATAT                    |
| 8           | 2F5  | 2                    | 11, ?      | 1987528            | ATATAATAATCTTAA                     | TTAATAATTATAATT                    |
| 9           | 2F4  | 1                    | 5          | 1319259            | ATGTTAATCAATTAA                     | TTAATGATTATATAT                    |
| 10          | 2D3  | 1                    | 12         | 2166205            | AATATATTAATTAA                      | TTAAAATTATCAGTT                    |
| 11          | 2B4  | 1                    | 11         | 598906             | CGTATGCTGCATTAA                     | TTAAAAGTATATTC                     |
| 12          | 2A2  | 1                    | 3          | 213676             | TAAAAACATAATTAA                     | TTAAATATAATAAAA                    |
| 13          | 2E2  | 1                    | 7          | 1379440            | AAAAACGTAATTAA                      | TTAAGAATAATTATA                    |
| 14          | 2D4  | 2                    | 14, ?      | 2285695            | TTTTTTTCTTTTAA                      | TTAAAGGAAATGTTG                    |
| 15          | 2G3  | 1                    | 5, ?       | 1288428            | ATCATATTACATTAA                     | TTAATTATAATGAAT                    |
| 16          | 2E4  | 1                    | 13         | 724860             | GGAGTTACCTATTAA                     | TTAATGCTAATCATA                    |
| 17          | 2H2  | 1                    | 12         | 1528986            | TTTGTATTTAATTAA                     | TTAAAAAAAATAA                      |
| 18          | 2H3  | 1                    | 5          | 1142963            | TTATAATATATTAA                      | TTAAGATTGCATGAT                    |
| 19          | 2H12 | 2                    | 11, ?      | 1987528            | ATATAATAATCTTAA                     | TTAATAATTATAATT                    |
| 20          | 2G6  | 2                    | 13         | 2403095            | ATACAGCATATTAA                      | TTAAAATATAATTAA                    |
| 21          | 2D7  | 1                    | 5          | 1288428            | ATCATATTACATTAA                     | TTAATTATAATGAAT                    |
| 22          | 2G10 | 1                    | 5          | 1288428            | ATCATATTACATTAA                     | TTAATTATAATGAAT                    |
| 23          | 2H8  | 1                    | 14         | 387148             | TTATATTTCTTTAA                      | TTAAACAACCTTGAGT                   |
| 24          | 2A9  | 1                    | 12         | 1528986            | TTTGTATTTAATTAA                     | TTAAAAAAAATAA                      |
| 25          | 2G11 | 1                    | 9          | 1006267            | AAAAATATATATTAA                     | TTAATATATATATAT                    |
| 26          | 2F11 | 1                    | 14         | 2285695            | TTTTTTTCTTTTAA                      | TTAAAGGAAATGTTG                    |
| 27          | 2A11 | 1                    | 4          | 732679             | ATCTATATTTTAA                       | TTAAAGGAAAGAAGA                    |
| 28          | 2F12 | 1                    | 13         | 724860             | GGAGTTACCTATTAA                     | TTAATGCTAATCATA                    |
| 29          | 2F6  | 1                    | 9          | 823324             | AATAGCATATGTTAA                     | TTAAATATAAAAATAA                   |

*piggyBac* insertion position for each of 29 IGMs identified by inverse PCR. In seven IGMs with multiple insertions, at least one insertion position was identified by inverse PCR. Insertion position indicates the nucleotide at the 5' end of the insertion. In all cases, *piggyBac* inserted into the conical TTAA site at both the inverted terminal repeat 1 (ITR1) and ITR2 sides.

**Table S3. Primer sequences**

| Primer      | Sequence                   |
|-------------|----------------------------|
| PFE1370wF   | TGTGCACACGCTGATATTGA       |
| PFE1370wR   | ATGCCTTTTCAGCTGCTTC        |
| PF11_0167F  | GCTCATCACTGCAGGACTTG       |
| PF11_0167R  | CCTTGGCACAAGAGCATT         |
| PFE1615cF   | TGTTGAAGAAGACCCAAGTGAA     |
| PFE1615cR   | GCGCTTCTAAAAGATCAGCA       |
| PFD0800cF   | GATGCCACGATCGTTTTAT        |
| PFD0800cR   | GGATTCAAAGGGTCCAAATG       |
| PFL1770cF   | GCCAAAGTGAAGAGCAAAGG       |
| PFL1770cR   | TTTCGGTTTTGTGCCGTAT        |
| PFL2550wF   | CGGGAAGAAGAATTGACTGAA      |
| PFL2550wR   | CCACGATATATTTCCCCACA       |
| PF14_0532F  | GGAAATATCCAGCCCAACAAA      |
| PF14_0532R  | ATTCGGTGCCATTAGGGTTA       |
| PFI1215wF   | GAGCCACGTTGAAAAACAT        |
| PFI1215wR   | ACTTCTTGATCCGGCTTGAA       |
| MAL7P1.171F | GAGGAACATCCCCAGATGA        |
| MAL7P1.171R | ATACCGTGGCTTTTGATGC        |
| PFC0200wF   | TTGGAGGTCAAACAAACCA        |
| PFC0200wR   | CTGCTCCTCCCTCTTTTTTC       |
| PFI0980wF   | GCTTGAAACAGACGCATCAA       |
| PFI0980wR   | TCCACCGTAAAGCTCCATGT       |
| PF14_0097F  | TCCAACCATTTGTATCTTGAA      |
| PF14_0097R  | GGTGCTAAGAATGCAGCAAA       |
| PF07_0055F  | CATGAATGGGCAGACAGAGA       |
| PF07_0055R  | TCTTTTGCTTTTTCTTTTCAAGT    |
| PF14_0595F  | TGAATGCATCCAAACAAATGA      |
| PF14_0595R  | TTTTTCTTCTGAAGAGCAGCA      |
| PFE1570cF   | AAACAAACCATTTTTGTTCCGAT    |
| PFE1570cR   | CTTTGGGGGTTGGATTTT         |
| PF13_0097F  | AAAAGTTTTGTGCGTCTTCA       |
| PF13_0097R  | CGTTATCCTCCGAAATGGAA       |
| PF07_0073F  | AAGTAGCAGGTATCGTGTTT       |
| PF07_0073R  | TTGGGCACATTCTTCCATAA       |
| PFE1365wF   | TGAAATTAAGAAAATGGCGAAG     |
| PFE1365wR   | CCCCATAAGCATACTGCACA       |
| PFC0195wF   | CGAAAAGGTGCTGATTCAAA       |
| PFC0195wR   | TCGATGGACATAGGACCGTA       |
| PFD0805wF   | CCTTTGGTATAAATTATAGTACCTG  |
| PFD0805wR   | TTCCACCTTTCAAATAATATGG     |
| PF14_0096F  | CCCAGCACCATCGATACCTA       |
| PF14_0096R  | TCAATGGCCCTAAGGTTTCA       |
| PFL1775cF   | ATACCCCAATACGCATCTG        |
| PFL1775cR   | CCCTCAATAAAACGGGAGTG       |
| PF11_0166F  | GAAAGAAGATCAAGTGTCAC       |
| PF11_0166R  | GAGACTTTTAATTCTGTGAGTAAAAG |
| PFL2545cF   | TGATGCACAAGATGATTTTATG     |
| PFL2545cR   | CAACATTTGACTGAACTTTTC      |
| PFI1210wF   | TAGGCCCAGACAAAGGTGAG       |
| PF1210wR    | TCGACCTTCTTCGTTTCTTTC      |
| MAL7P1.170F | TTGCTGTAAGCAACCCACAG       |
| MAL7P1.170R | TGGCAATTACGTGAAGTGGA       |
| PF07_0055F  | TTCATCTTCACATATGACCC       |
| PF07_0055R  | AAAAGGTCTTCAGGTTTTTC       |
| PFE1590wF   | GAATGCCTAGTAAGCATGATTC     |
| PFE1590wR   | TTACCTACGGAAACCTTG         |
| Inverse F1  | AGATGTCCTAAATGCACAGCGAC    |
| Inverse F2  | CTCCAAGCGGCGACTGAG         |
| Inverse F3  | CATTGACAAGCACGCTCAC        |
| Inverse F4  | GCTATTTAGAAAAGAGAGAGC      |
| Inverse R1  | GTCAATGCGGTAAGTGTCACTGA    |
| Inverse R2  | GTAAGTGTCACTGATTTTGAATAACG |
| Inverse R3  | GACGCATGATTATCTTTTACGTGAC  |

**Table S3. Cont.**

| Primer                   | Sequence                                  |
|--------------------------|-------------------------------------------|
| Inverse R4               | TATCGATACCGTCGACCTCG                      |
| Episomal check F (T7)    | TAATACGACTCACTATAGGG                      |
| Episomal check R (M13R)  | GGAAACAGCTATGACCATG                       |
| hDHFRF                   | ATGCATGGTTTCGCTAAACTGC                    |
| hDHFRR                   | TTAATCATTCTCTCCATATAC                     |
| PFE1615c rescue F        | CAAGGGCCCGATATGTGTGAAAAGTGGGAATG          |
| PFE1615c rescue R        | CAAGGTACCATTTATGTAGAGAGTGTCTATG           |
| PFD0800c rescue F        | TAATGCGGCCGCGGTACCGAATGTAATAAAAATGTGCTCTG |
| PFD0800c rescue R        | TAATACTAGTGGGCCCTTAACAAAGTGAGGAATCTTCATCA |
| PF11215w rescue F        | TAATGCGGCCGCTGGAGGAGATCCACAGAATG          |
| PF11215w rescue R        | TAATACTAGTTGTATATACGGGTCGTCAAAAA          |
| PFL2550w rescue F        | TAATGCGGCCGCATTTAATGAAAAACGAAAAACCAT      |
| PFL2550w rescue R        | TAATACTAGTTTTCATTTTCACACAATCAAATCT        |
| PFC0200w rescue F        | CAAGGGCCCAGCAGGAAACCAAAGTAAGCA            |
| PFC0200w rescue R        | CAAGGTACCTGACTCCATTACATACAGTCACATAAA      |
| Pfs230F(PFB0405w)        | ACTTTCCCCCTGTGGTACA                       |
| Pfs230R                  | TTCATCCAAGAAAGCACATCC                     |
| Pf11.1F (PF10_0374)      | AAGGCTAAGCATCTAAAGGGTTC                   |
| Pf11.1R                  | AACTCCAGCCTGCTTTCTCT                      |
| Pfs48/45F(PF13_0247)     | ATTTCTGCGAAAAAGGCTCA                      |
| Pfs48/45R                | CCTACGTTACGCATATCTGG                      |
| Pfs28F (PF10_0303)       | TGAGGACACGTGTGGAAAAA                      |
| Pfs28R                   | TCTCGACAAACATTAGGAACACA                   |
| Pfg377F (PFL2405c)       | CTGAACCATGGCCTCTTGAT                      |
| Pfg377R                  | AACCTTCGTTGTGGTCTTCG                      |
| PfsMR5F (PFB0400w)       | ATGGATCACATGCATCCTCA                      |
| PfsMR5R                  | TTGTAGGGGCAGCTAAATCC                      |
| a-Tubulin IIF (PFD1050w) | TGCTGAGAAGGCATATCACG                      |
| a-Tubulin IIR            | CGGCAGCATTAACATCCTTT                      |
| Pfs47F (PF13_0248)       | TGGGTGTGATTTTACGAAACC                     |
| Pfs47R                   | TGCGAATCGATTTCTTTTCA                      |
| Pfmdv1F (PFL0795c)       | CCGTTTCTCATTAGCATTTCC                     |
| Pfmdv1R                  | TAGGAGCAAAAGCAGGTGAT                      |
| Pfs16F (PFD0310w)        | TTCTTCGTTTTGCAAACCT                       |
| Pfs16R                   | AAAGGCATTTTGTGACGAGAA                     |
| Pfg748F (PF14_0748)      | CAATGGGAATTCTGATAAAGCTG                   |
| Pfg748R                  | GTCATTTCTGTTGGGTATCGT                     |
| Pfg744F (PF14_0744)      | TTCTTACAGGCGCCAGAACT                      |
| Pfg744R                  | CTTCCGTCAACAGAGCCATT                      |
| Pfg164F (PF10_0164)      | GCGTTGAAGGATATCGACAGA                     |
| Pfg164R                  | GCGTTGAAGGATATCGACAGA                     |
| Pfg27F (PF13_0011)       | GCCCTTGGATAAATTTGGAA                      |
| Pfg27R                   | GGATCCTTGCTAAGGGTCATC                     |

Primer sequences used in this work.

**Fig. S1.** RT-PCR analysis of the putatively disrupted genes in each of 22 insertional gametocyte-deficient mutants (IGMs) with single *piggyBac* insertions. mRNA abundance was assessed by semiquantitative RT-PCR using primers designed to amplify ~150 bp of the transcript coding region (Table S3). Seryl-tRNA synthetase (PF07\_0073) was used as a loading control (CTRL) (1). The results are grouped according to the position of *piggyBac* insertion (*pB*) and the orientation of the flanking genes. (A) Analysis of mRNA abundance of IGMs where *piggyBac* inserted directly into the ORF. In all cases, mRNA abundance was reduced or completely absent, indicating gene knockdown or complete KO. (B and C) *piggyBac* insertions between two ORFs with the same transcriptional orientation. (B) Transcriptional orientation to the telomere. (C) Transcriptional orientation to the centromere. In all cases, mRNA abundance was reduced or absent in the downstream ORF. (D) *piggyBac* insertions between two ORFs with opposite transcriptional orientations. In all cases, mRNA was decreased in only one of the ORFs.

### Fig. S1

1. Rovira-Graells N, et al. (2012) Transcriptional variation in the malaria parasite *Plasmodium falciparum*. *Genome Res* 22(5):925–938.

**Fig. S2.** Changes of mRNA abundance for each of the putatively disrupted genes during the asexual life cycle. The patterns of mRNA expression for each of 16 putatively disrupted genes were measured in tightly synchronized parental parasites. RNA was prepared from samples collected at 0 (ER), 12 (LR), 24 (ET), 30 (T), 34 (LT), 38 (ES), 44 (S), and 48 (LS) h postinvasion. Quantitative RT-PCR was performed with the primers listed (Table S3). In all cases, the mRNA expression patterns matched those patterns estimated from microarray analysis (1). ER, early ring; ES, early schizont; ET, early trophozoite; LR, late ring; LS, late schizont; LT, late trophozoite; S, schizont; T, trophozoite.

[Fig. S2](#)

1. Le Roch KG, et al. (2003) Discovery of gene function by expression profiling of the malaria parasite life cycle. *Science* 301(5639):1503–1508.

**Fig. S3.** Semiquantitative RT-PCR of gametocyte-specific transcripts for each IGM. Results of semiquantitative RT-PCR expression assays with two independent biological replicates of each IGM parasite as well as the parental line (P). The parasite source is indicated above each lane. Expression of each of 16 IGM genes as well as additional gametocyte-specific genes (1) was assayed. Results for the seryl-tRNA synthetase mRNA (loading control) are shown in the first row. The results were tabulated in a binary fashion. The gene was considered expressed if a band was present in either biological replicate. The gene was considered not expressed if both biological replicates were negative. A summary of these results is presented in Fig. 4.

[Fig. S3](#)

1. Young JA, et al. (2005) The *Plasmodium falciparum* sexual development transcriptome: a microarray analysis using ontology-based pattern identification. *Mol Biochem Parasitol* 143(1): 67–79.
